# Supplementary material for: Investigations on Thermomechanical and Biodegradable Properties of Alkaline Hydrolysis Isolated Nano Hydroxyapatite Reinforced Polylactic Acid Composite Blown Films for sustainable Packaging
Source: Research Square preprint supplement (doi:10.21203/rs.3.rs-7216042/v1), 2025-08-04

**Investigations on Thermomechanical and Biodegradable Properties of Alkaline Hydrolysis Isolated Nano Hydroxyapatite Reinforced Polylactic Acid Composite Blown Films for sustainable Packaging**

Radhika Panickar a, Devotha Mwazembe b, Benny Alexander c, Edwin Freeman c, Desmond Mortley b, Vijaya Rangari a

**Graphical Abstract**


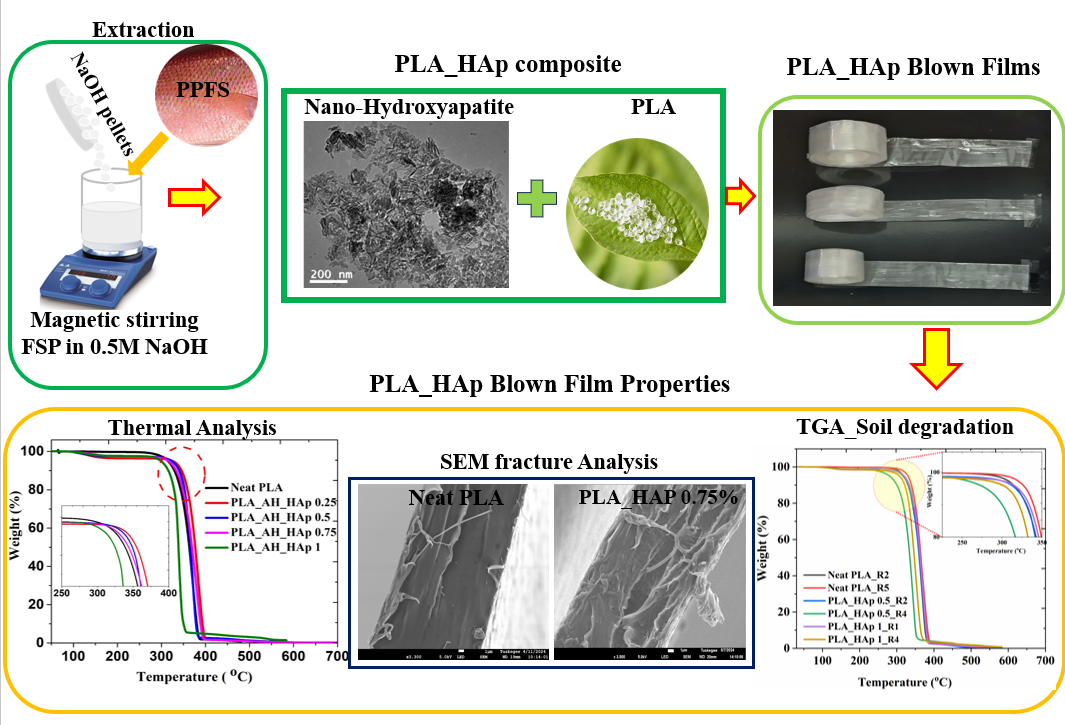

Supplement: Supplementary file 1 [file b4f0e492fd00081fde253155.docx]
